# Supplementary material for: Delineation of Diverse Macrophage Activation Programs in Response to Intracellular Parasites and Cytokines
Source: PLOS journal article supplement (doi:10.1371/journal.pntd.0000648), 2010-03-29

Supplementary Figure 5

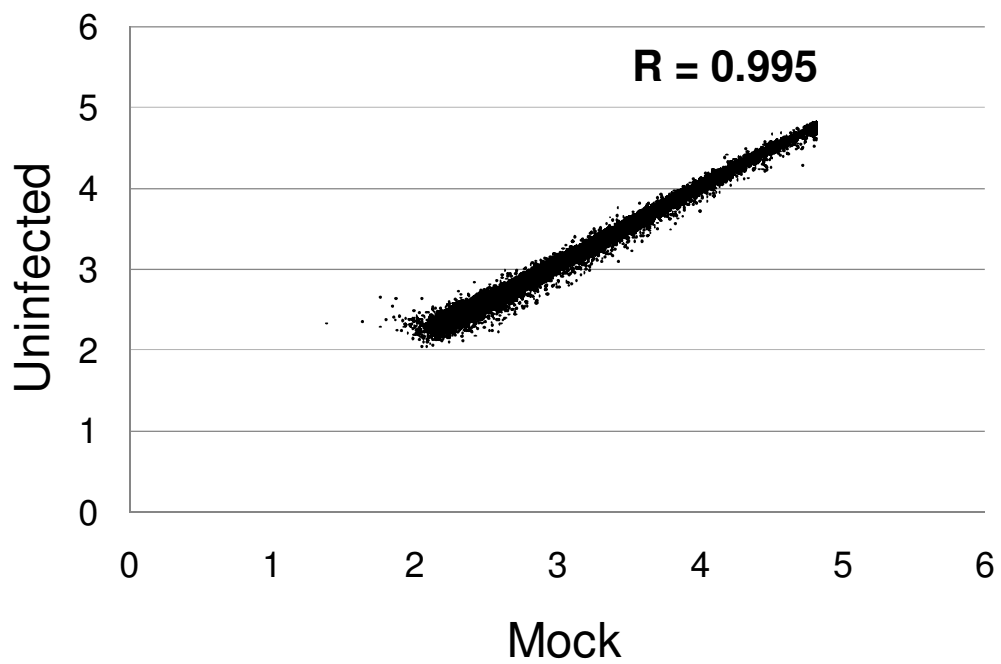

Supplement: S8 (10.1371/journal.pntd.0000648.s008) [file journal.pntd.0000648.s008]
