# Supplementary material for: Delineation of Diverse Macrophage Activation Programs in Response to Intracellular Parasites and Cytokines
Source: PLOS journal article supplement (doi:10.1371/journal.pntd.0000648), 2010-03-29

Supplementary Figure 10

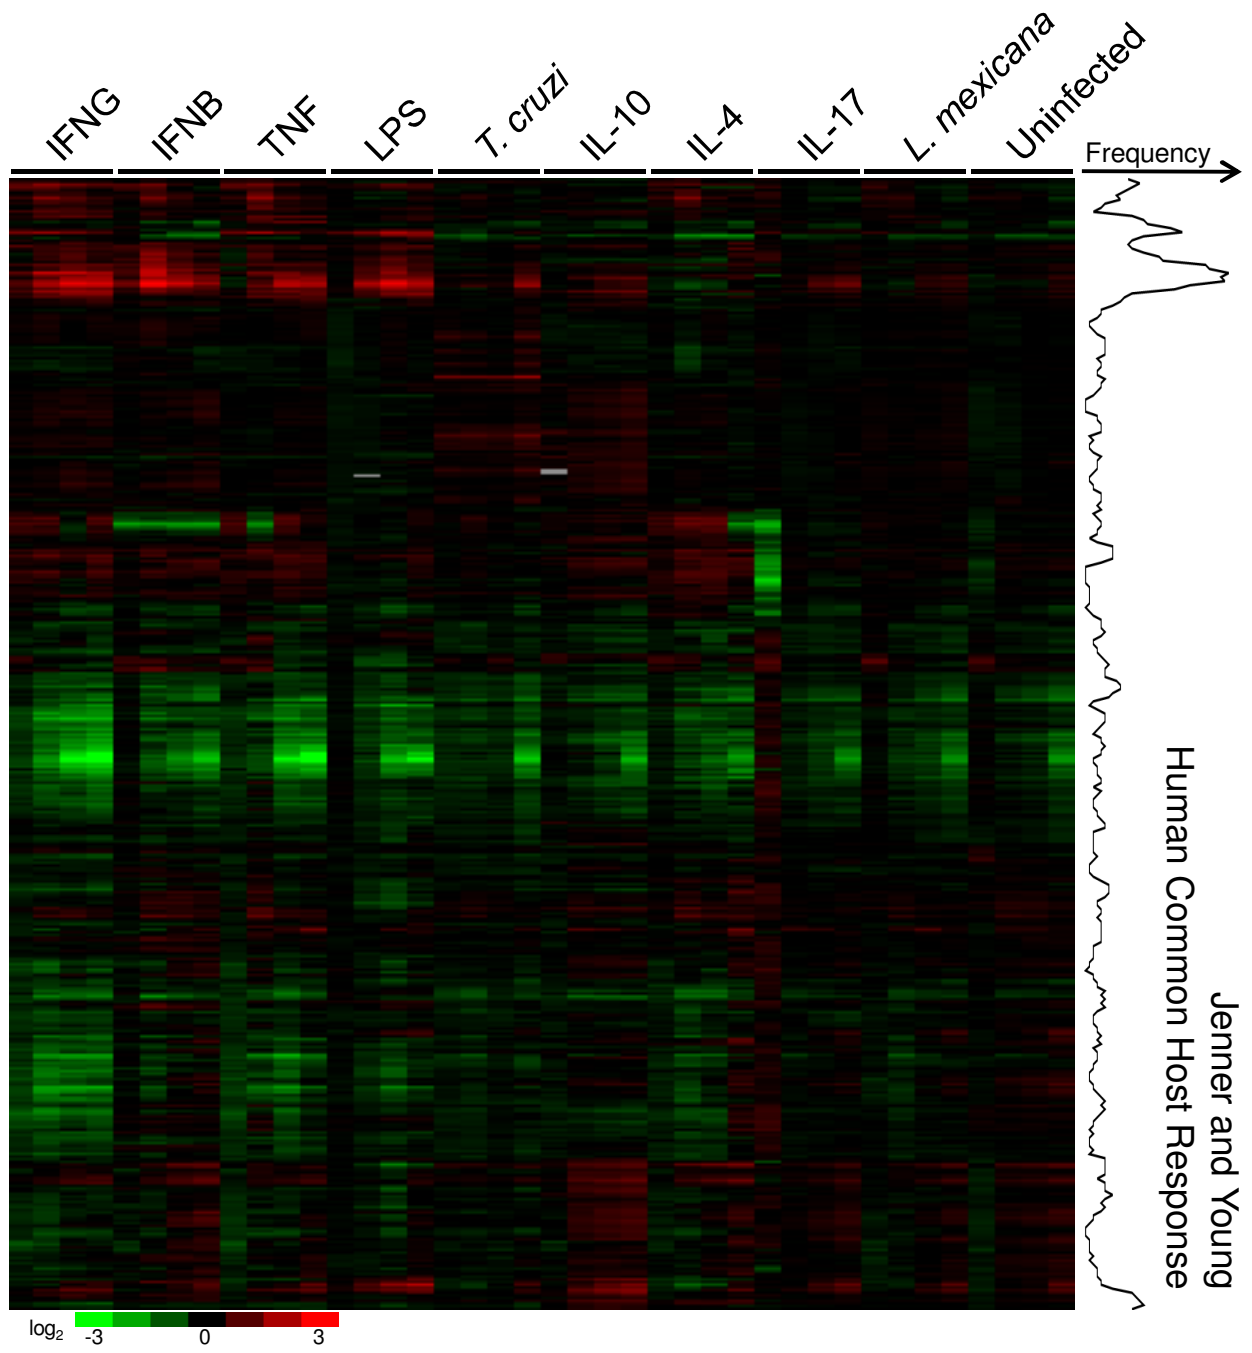

Supplement: S13 (10.1371/journal.pntd.0000648.s013) [file journal.pntd.0000648.s013]
